# Supplementary material
Source: Research Square preprint supplement (doi:10.21203/rs.3.rs-9383752/v1)
Supplement: Supplementary file 1 [file 68a36aa01d081546f3b8e20d.docx]

Table 4. Surgery-related outcomes of the two groups.

|  | **LBPS group**  **(N=12)** | **SEMS group**  **(N=48)** | ***P* value** |
| --- | --- | --- | --- |
| Time to surgery, days, median (IQR) | 64 (45-78) | 73 (29-106) | 0.426 |
| Resection success, n (%) | 12 (60.0) | 48 (80.0) | 0.133 |
| Surgical procedure, n (%) |  |  | 0.030 |
| -SSPPD | 12/12 (100) | 29/48 (60.4) |  |
| -PPPD | 0 | 18/48 (37.5) |  |
| -PD | 0 | 1/48 (2.0) |  |
| Curative surgery, R0, n (%) | 11/12 (91.6) | 35/48 (72.9) | 0.261 |
| Intraoperative bleeding, ml, median (IQR) | 721 (582-800) | 891 (503-1528) | 0.149 |
| Surgery time, min, median (IQR) | 409 (391-424) | 542 (502-624) | <0.001 |
| Surgery-related AEs, n (%) | 2/12 (16.6) | 7/48 (14.5) | >0.99 |
| -Pancreatic fistula | 2 | 1 |  |
| -Biloma | 0 | 3 |  |
| -Abscess | 0 | 1 |  |
| -Others | 0 | 4 |  |
| Surgery-related death, n (%) | 0 | 0 | >0.99 |
| Histology, n (%) |  |  | 0.229 |
| -Well differentiated | 6/12 (50.0) | 12 (25.0) |  |
| -Moderately differentiated | 5 (41.6) | 28 (58.3) |  |
| -Poorly differentiated | 0 | 6 (12.5) |  |
| -Others | 1/12 (8.3) | 2 (4.1) |  |
| Final stage, n (%) |  |  | 0.117 |
| -ⅠA | 5/12 (41.6) | 9/48 (18.7) |  |
| -ⅠB | 4/12 (33.3) | 7/48 (14.5) |  |
| -ⅡA | 0 | 1/48 (2.0) |  |
| -ⅡB | 2/12 (16.6) | 27/48 (56.2) |  |
| -Ⅲ | 1/12 (8.3) | 4/48 (8.3) |  |
| Post-operative hospital stay, days, median (IQR) | 21 (15-27) | 27 (23-37) | 0.080 |

AEs, adverse events; IQR, interquartile range; LBPS, large bore plastic stent; PD, pancreaticoduodenectomy; PPPD, pylorus preserving pancreaticoduodenectomy; RBO, recurrent biliary obstruction; SEMS, self-expandable metallic stent; SSPPD, subtotal stomach-preserving pancreaticoduodenectomy.
