# Supplementary material
Source: Research Square preprint supplement (doi:10.21203/rs.3.rs-9383752/v1)
Supplement: Supplementary file 2 [file 6c6661e21ed69af18fed024f.docx]

Table 3. Univariable and multivariable analysis for risk factors associated with RBO.

|  |  |  |  | **Univariable analysis** | | **Multivariable analysis** | |
| --- | --- | --- | --- | --- | --- | --- | --- |
|  |  | **No.**  **of cases** | **No.**  **of events** | **OR**  **(95% CI)** | ***p* value** | **OR**  **(95% CI)** | ***p* value** |
| Age | ≥ 70 | 42 | 12  (28.5) | 0.564  (0.187-1.598) | 0.284 | - | - |
| Sex | Male | 41 | 8  (19.5) | 1.620  (0.576-4.724) | 0.360 | - | - |
| Initial total bilirubin level, mg/dl | ≥ 5.5 | 40 | 10  (25.0) | 0.870  (0.305-2.453) | 0.792 | - | - |
| Initial total albumin level, mg/dl | ≥ 3.9 | 45 | 11  (24.4) | 0.915  (0.314-2.582) | 0.868 | - | - |
| CA19-9, U/ml | ≥ 297 | 40 | 11  (27.5) | 0.659  (0.226-1.852) | 0.429 | - | - |
| Primary tumor diameter, mm | ≥ 22 | 40 | 8  (20.0) | 1.517  (0.539-4.419) | 0.429 | - | - |
| Dilated bile duct diameter, mm | ≥ 13 | 40 | 12  (30.0) | 0.198  (0.051-0.618) | 0.004 | 0.198  (0.049-0.658) | 0.007 |
| Biliary stricture length, mm | ≥ 15 | 41 | 15  (36.5) | 0.494  (0.164-1.401) | 0.186 | 0.415  (0.120-1.309) | 0.135 |
| Primary clinical stage | ≥ Ⅱ | 17 | 7  (41.1) | 0.336  (0.105-1.088) | 0.068 | 0.355  (0.098-1.267) | 0.109 |
| Neoadjuvant chemotherapy | Yes | 42 | 11  (26.1) | 0.751  (0.258-2.113) | 0.589 | - | - |
| EST | Yes | 73 | 18  (24.6) | 0.509  (0.026-3.264) | 0.516 | - | - |
| Stent type | LBPS | 20 | 4  (20.0) | 1.333  (0.410-5.201) | 0.644 | 2.000 (0.538-8.894) | 0.310 |

EST, endoscopic sphincterotomy; LBPS, large bore plastic stent; OR, odds ratio; 95% CI, 95% confidence interval.
