# Supplementary material
Source: Research Square preprint supplement (doi:10.21203/rs.3.rs-9383752/v1)
Supplement: Supplementary file 3 [file 87f647067b4cbb9bc712258d.docx]

Table 1. Patient characteristics of the two groups.

|  | **LBPS group**  **(N = 20)** | **SEMS group**  **(N =60)** | ***P* value** |
| --- | --- | --- | --- |
| Age, y.o, median (IQR) | 69 (57-83) | 70 (63-77) | 0.643 |
| Sex, Male, n (%) | 11 (55.0) | 30 (50.0) | 0.798 |
| Initial total bilirubin level, mg/dl, median (IQR) | 4.6 (1.6-8.6) | 6.1 (1.7-10.1) | 0.961 |
| Initial total albumin level, mg/dl, median (IQR) | 3.8 (3.5-3.9) | 4.0 (3.8-4.3) | 0.007 |
| CA19-9, U/ml, median (IQR) | 251 (93-913) | 310 (64-796) | 0.322 |
| Primary tumor diameter, mm, median (IQR) | 21 (18-25) | 22 (18-25) | 0.907 |
| Diameter of main pancreatic duct, mm, median (IQR) | 4 (3-6) | 4 (3-7) | 0.776 |
| History of pancreatitis, n (%) | 0 | 0 | >0.99 |
| History of EST, n (%) | 0 | 26 (43.3) | <0.001 |
| Pancreatic atrophy, n (%) | 3 (15.0) | 22 (36.6) | 0.070 |
| Dilated bile duct diameter, mm, median (IQR) | 14 (11-16) | 12 (11-15) | 0.134 |
| Biliary stricture length, mm, median (IQR) | 18 (12-33) | 14 (10-20) | 0.031 |
| Primary clinical stage, n (%) |  |  | 0.743 |
| -ⅠA | 9 (45.0) | 25 (41.6) |  |
| -ⅠB | 8 (40.0) | 21 (35.0) |  |
| -ⅡA | 0 | 3 (5.0) |  |
| -ⅡB | 3 (15.0) | 11 (18.3) |  |
| Resectability, n (%) |  |  | >0.99 |
| -R | 14 (70.0) | 40 (66.6) |  |
| -BR | 6 (30.0) | 20 (33.3) |  |
| Neoadjuvant chemotherapy, n (%) | 11 (55.0) | 31 (51.6) | >0.99 |
| -GS | 7 | 22 |  |
| -GnP | 4 | 5 |  |
| -mFX | 0 | 3 |  |
| -S-1 | 0 | 1 |  |
| Radiation therapy, n (%) | 0 | 9 (15.0) | 0.102 |

BR, borderline resectable; GnP, gemcitabine plus nab-paclitaxel; GS, gemcitabine plus S-1; IQR, interquartile range; LBPS, large bore plastic stent; mFX, modified FOLFIRINOX; R, resectable; SEMS, self-expandable metallic stent.
