# Supplementary material
Source: Research Square preprint supplement (doi:10.21203/rs.3.rs-9383752/v1)
Supplement: Supplementary file 4 [file f46867ce929d5e1e6f77bdb9.docx]

Table 2. ERCP-related outcomes of the two groups

|  | **LBPS group**  **(N=20)** | **SEMS group**  **(N=60)** | ***P* value** |
| --- | --- | --- | --- |
| Prophylactic rectal NSAIDs, n (%) | 19 (95.0) | 28 (46.6) | <0.001 |
| Cannulation method, n (%) |  |  | 0.645 |
| -Standard | 10 (50.0) | 28 (46.6) |  |
| -Guidewire-assisted | 8 (40.0) | 18 (30.0) |  |
| -Pancreatic guidewire-assisted | 1 (5.0) | 7 (11.6) |  |
| -Precut | 1 (5.0) | 3 (5.0) |  |
| -EUS-RV | 0 | 4 (6.6) |  |
| Pancreatography, n (%) | 5 (25.0) | 20 (33.3) | 0.584 |
| Pancreatic duct stent, n (%) | 0 | 5 (8.3) | 0.323 |
| EST, n (%) | 20 (100) | 53 (88.3) | 0.183 |
| Stent size, n (%) |  |  | <.0001 |
| -11.5Fr | 20 (100) | 0 |  |
| -8mm | 0 | 5 (8.3) |  |
| -10mm | 0 | 37 (61.6) |  |
| -12mm | 0 | 18 (30.0) |  |
| Stent length, n (%) |  |  | <.0001 |
| -5cm | 4 (20.0) | 6 (10.0) |  |
| -6cm | 0 | 35 (58.3) |  |
| -7cm | 16 (80.0) | 8 (13.3) |  |
| -8cm | 0 | 11 (18.3) |  |
| Technical success, n (%) | 20 (100) | 60 (100) | >0.99 |
| Clinical success, n (%) | 19 (95.0) | 56 (93.3) | >0.99 |
| AEs, n (%) | 6 (30.0) | 26 (43.3) | 0.429 |
| -RBO, n (%) | 4 (20.0) | 15 (25.0) | 0.768 |
| -Non-RBO AEs, n (%) | 2 (10.0) | 17 (28.3) | 0.132 |
| Acute pancreatitis, n (%) | 0 | 11 (18.3) | 0.057 |
| Acute cholecystitis, n (%) | 0 | 5 (8.3) | 0.323 |
| Non-obstructive cholangitis, n (%) | 2 (10.5) | 2 (3.3) | 0.258 |

AEs, adverse events; ERCP, endoscopic retrograde cholangiopancreatography; EST, endoscopic sphincterotomy; EUS-RV, endoscopic ultrasound-guided rendezvous; LBPS, large bore plastic stent; NSAIDs, non-steroidal anti-inflammatory drugs; RBO, recurrent biliary obstruction; SEMS, self-expandable metallic stent.
